# Supplementary material for: Dietary Interventions during Living Kidney Donations (DILKID) - an open-label, randomized controlled pilot trial study protocol
Source: Research Square preprint supplement (doi:10.21203/rs.3.rs-7095136/v1), 2025-09-01

**Telephone Log Day 2 of the diet**

| **Well-being in the last two days?** |
| --- |
| Please state a number between 1 and 10, 1 representing a very bad and 10 an excellent well-being. |

______

-
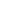


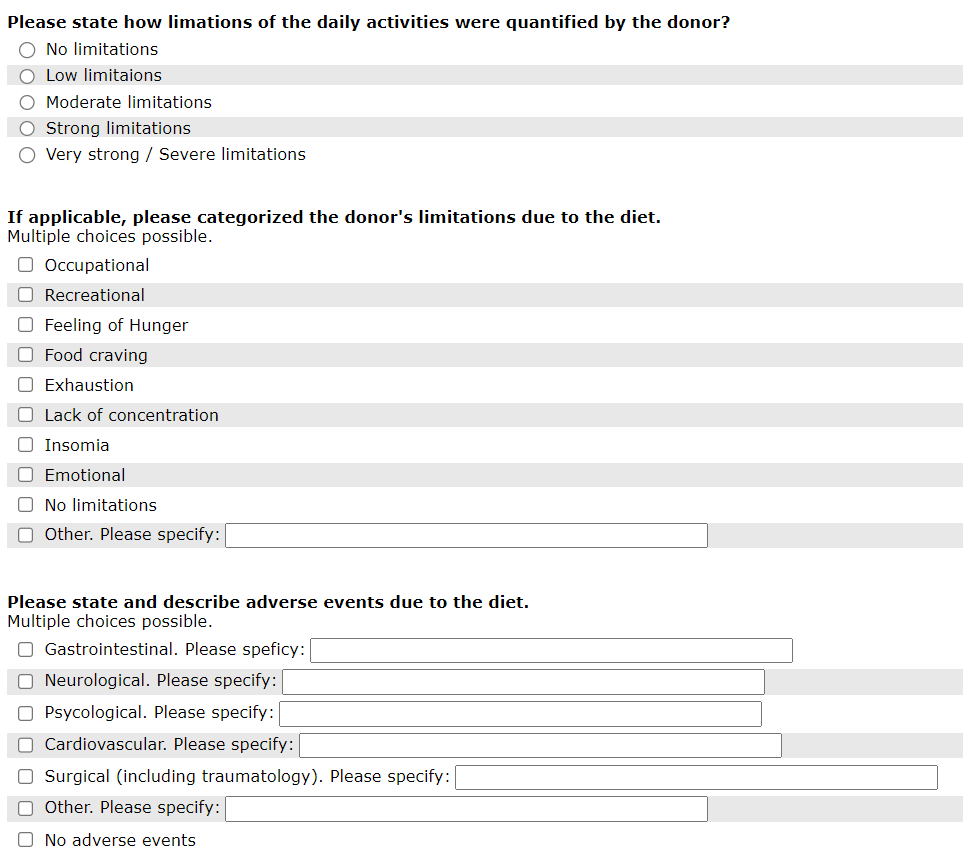


**Telephone Log Day 4 of the diet**

| **Well-being in the last two days?** |
| --- |
| Please state a number between 1 and 10, 1 representing a very bad and 10 an excellent well-being. |

______

-
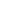


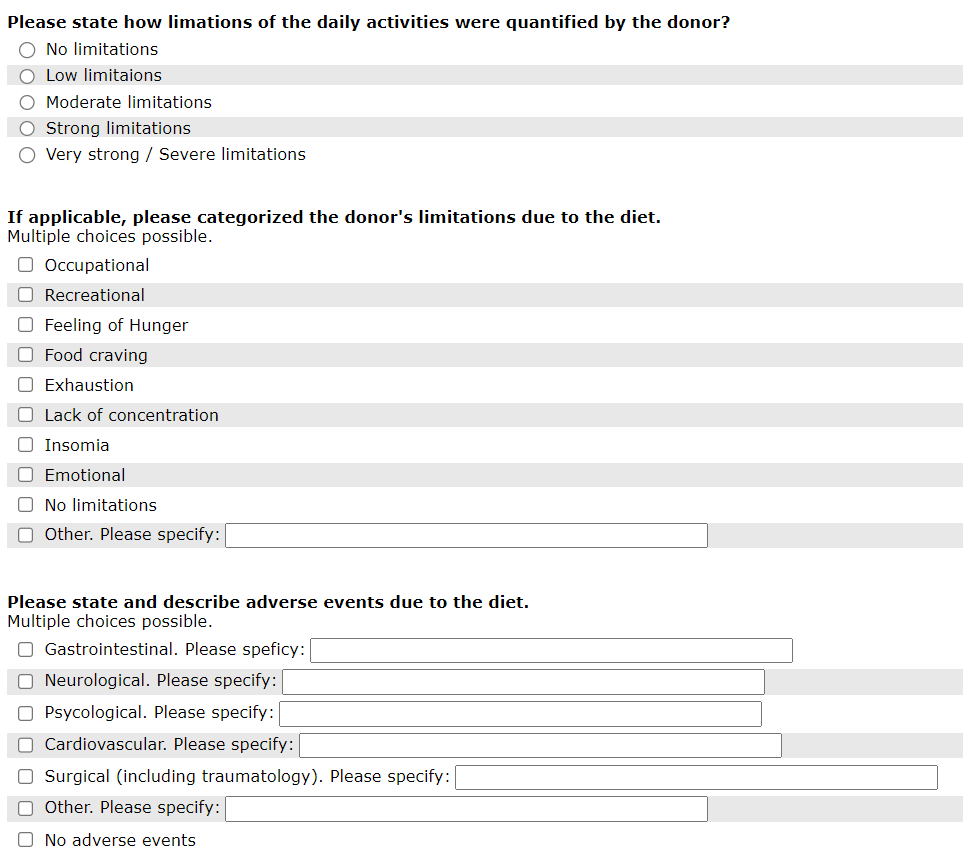


**Telephone Log Day 6 of the diet**

| **Well-being in the last two days?** |
| --- |
| Please state a number between 1 and 10, 1 representing a very bad and 10 an excellent well-being. |

______

-
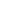


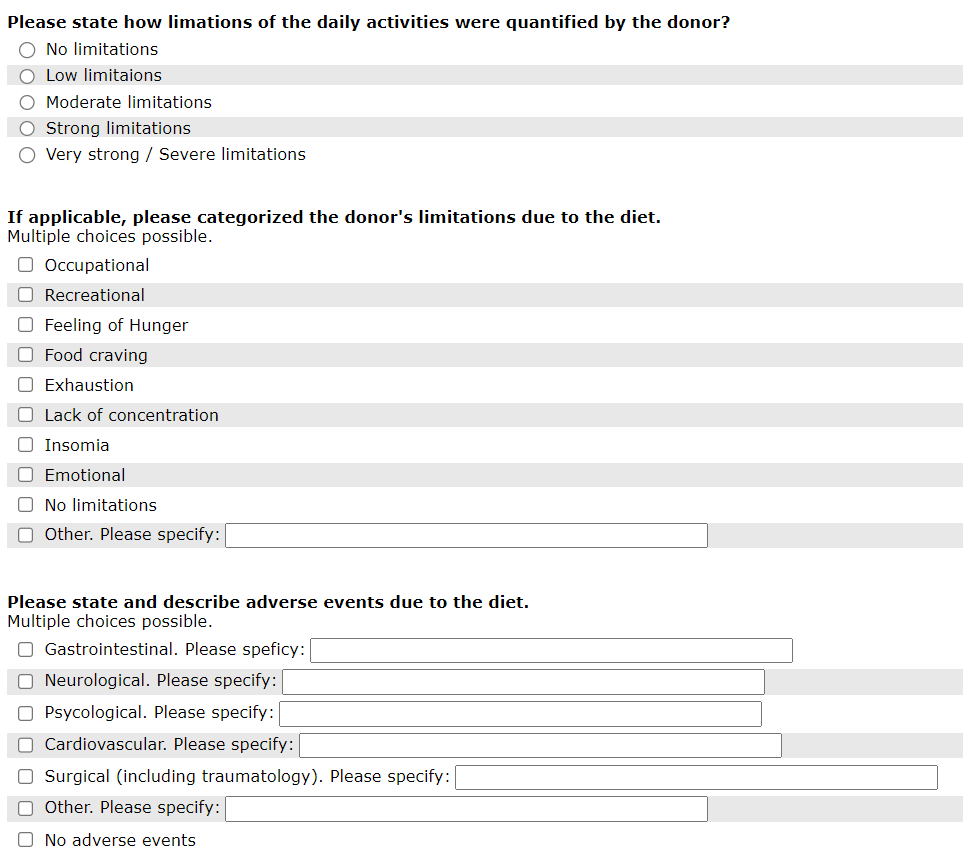

Supplement: Supplementary file 3 [file baafae30cd0ec9252bd1048e.docx]
