# Supplementary figures and images for: Dietary Interventions during Living Kidney Donations (DILKID) - an open-label, randomized controlled pilot trial study protocol
Source: Research Square preprint supplement (doi:10.21203/rs.3.rs-7095136/v1), 2025-09-01

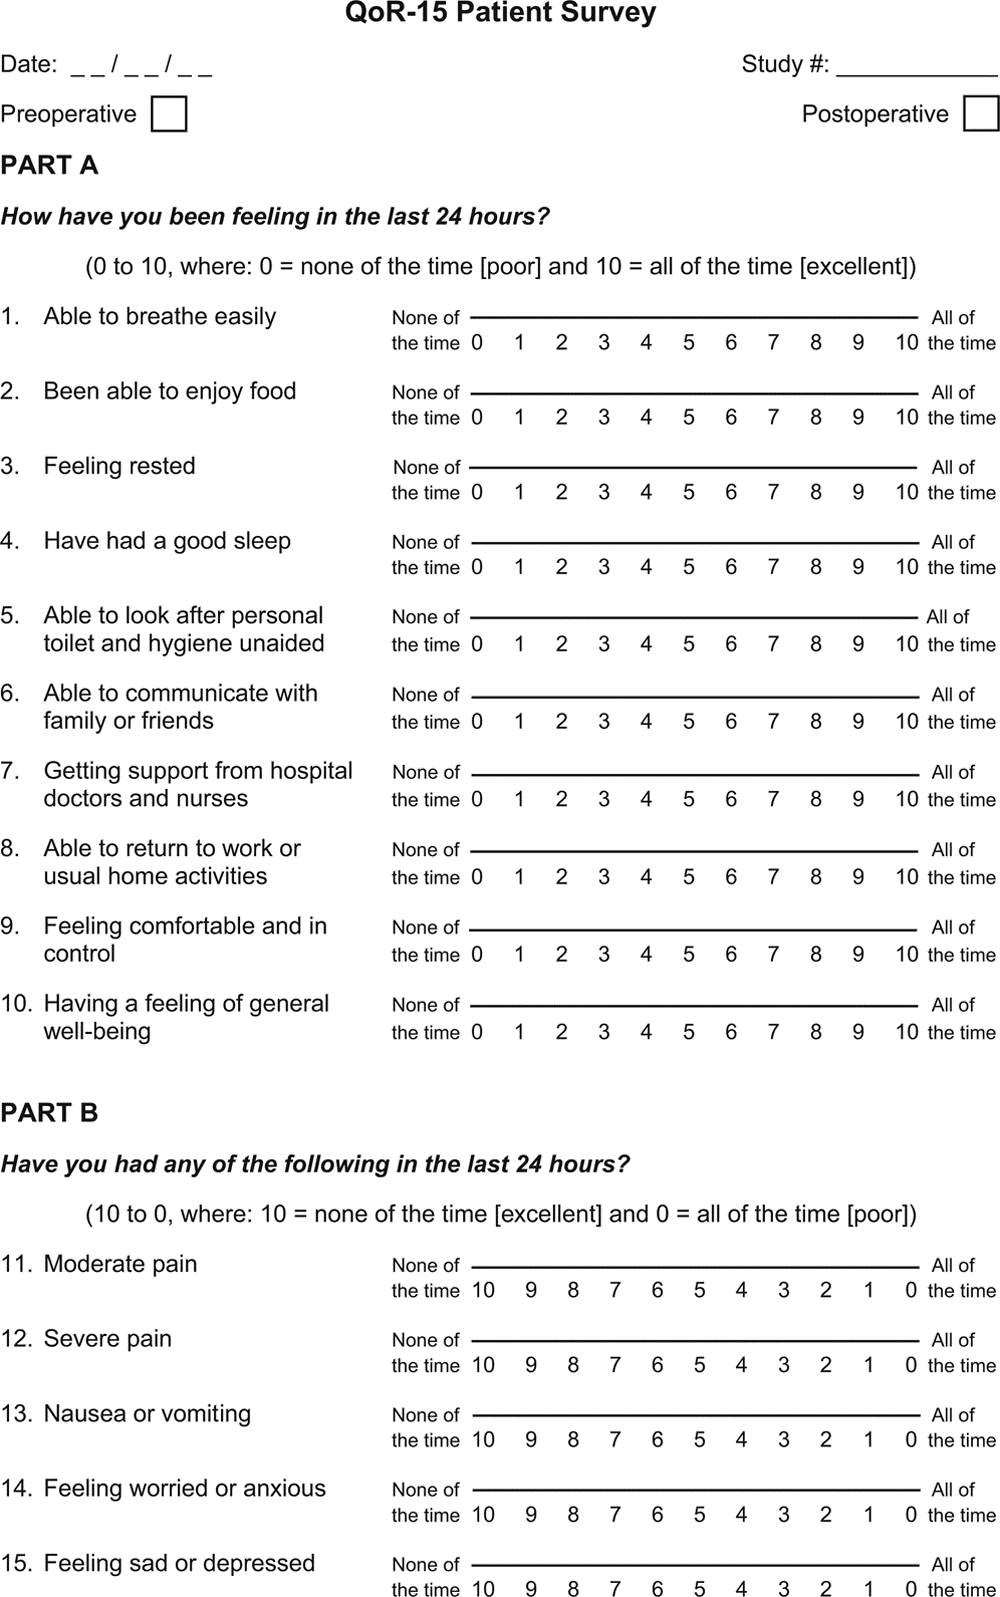

Supplement: Supplementary file 1 [file 8d84874b26d8d587f1b59705.docx]
